# Supplementary material
Source: Springer Nature journal article supplement (https://www.springerprofessional.de/resource/supplementary/13173_2013_12_MOESM3_ESM.pdf/11897014)

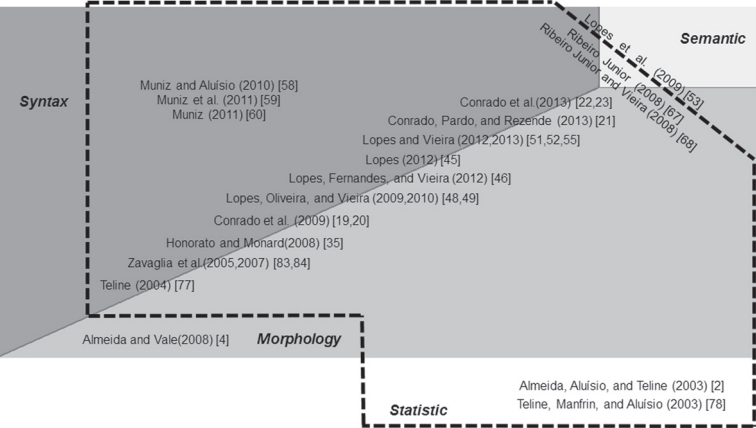

Supplement: MOESM3 [file 11897014]
